# Supplementary material for: Social Determinants and Access to Water-Sanitation-Hygiene as Dominant Risk Factors of Stunting among Under-five Children in Rural Area of East Indonesia
Source: Preprints.org preprint supplement (doi:10.20944/preprints202107.0279.v1), 2021-07-13
Supplement: Supplementary file 1 [file supplementary]

| **Percentage of nutrient inadequacy** | % |
| --- | --- |
| Calcium | 95.9 |
| Iron | 98 |
| Zinc | 99.5 |
| Vitamin Z | 3.6 |
| Riboflavin | 87.8 |
| Thiamin | 84.7 |
| Niacin | 24.5 |
| Folate | 98.5 |
| Vitamin B12 | 11.7 |
| Vitamin C | 88.3 |

**Supplementary Table**

**Table 1.** Percentage of nutrient inadequacy in underfive children
